# Supplementary material for: Proposal and testing goals-guided interaction for occasional users
Source: Springer Nature journal article supplement (doi:10.1186/s13673-020-0209-2), 2020-02-01
Supplement: MOESM3 [file 17709648]

## Time on tasks

| Time on task (in seconds) |         |    |        |     |      |        |     |      |        |     |      |        |      |      |
|---------------------------|---------|----|--------|-----|------|--------|-----|------|--------|-----|------|--------|------|------|
| #                         |         |    | Ttask1 |     |      | Ttask2 |     |      | Ttask3 |     |      | Ttotal |      |      |
| user                      | T-order | CE | DM     | GGI | diff | DM     | GGI | diff | DM     | GGI | diff | DM     | GGI  | diff |
| 1                         | DM-GGI  | 0  | 1023   | 512 | 511  | 1108   | 345 | 763  | 460    | 265 | 195  | 2591   | 1122 | 1469 |
| 2                         | GGI-DM  | 0  | 863    | 380 | 483  | 686    | 560 | 126  | 692    | 491 | 201  | 2241   | 1431 | 810  |
| 3                         | DM-GGI  | 0  | 590    | 510 | 80   | 800    | 280 | 520  | 770    | 286 | 484  | 2160   | 1076 | 1084 |
| 4                         | GGI-DM  | 0  | 185    | 155 | 30   | 597    | 206 | 391  | 508    | 176 | 332  | 1290   | 537  | 753  |
| 5                         | DM-GGI  | 1  | 425    | 330 | 95   | 690    | 420 | 270  | 420    | 210 | 210  | 1535   | 960  | 575  |
| 6                         | GGI-DM  | 1  | 280    | 371 | -91  | 318    | 487 | -169 | 1075   | 377 | 698  | 1673   | 1235 | 438  |
| 7                         | DM-GGI  | 1  | 150    | 135 | 15   | 155    | 220 | -65  | 541    | 105 | 436  | 846    | 460  | 386  |
| 8                         | DM-GGI  | 2  | 440    | 182 | 258  | 500    | 336 | 164  | 380    | 168 | 212  | 1320   | 686  | 634  |
| 9                         | GGI-DM  | 2  | 171    | 218 | -47  | 284    | 283 | 1    | 381    | 244 | 137  | 836    | 745  | 91   |
| 10                        | DM-GGI  | 2  | 400    | 350 | 50   | 355    | 165 | 190  | 565    | 205 | 360  | 1320   | 720  | 600  |
| 11                        | GGI-DM  | 2  | 122    | 120 | 2    | 103    | 207 | -104 | 285    | 118 | 167  | 510    | 445  | 65   |
| 12                        | DM-GGI  | 2  | 406    | 150 | 256  | 190    | 303 | -113 | 488    | 105 | 383  | 1084   | 558  | 526  |
| 13                        | GGI-DM  | 2  | 277    | 252 | 25   | 231    | 225 | 6    | 288    | 318 | -30  | 796    | 795  | 1    |
| 14                        | DM-GGI  | 3  | 370    | 120 | 250  | 216    | 145 | 71   | 274    | 164 | 110  | 860    | 429  | 431  |
| 15                        | GGI-DM  | 3  | 150    | 165 | -15  | 156    | 215 | -59  | 254    | 150 | 104  | 560    | 530  | 30   |
| 16                        | DM-GGI  | 3  | 250    | 173 | 77   | 245    | 247 | -2   | 405    | 250 | 155  | 900    | 670  | 230  |
| 17                        | GGI-DM  | 3  | 134    | 228 | -94  | 182    | 279 | -97  | 280    | 203 | 77   | 596    | 710  | -114 |
| 18                        | DM-GGI  | 3  | 330    | 205 | 125  | 123    | 205 | -82  | 310    | 140 | 170  | 763    | 550  | 213  |
| 19                        | GGI-DM  | 3  | 355    | 150 | 205  | 110    | 255 | -145 | 120    | 105 | 15   | 585    | 510  | 75   |
| 20                        | DM-GGI  | 3  | 274    | 138 | 136  | 220    | 136 | 84   | 233    | 203 | 30   | 727    | 477  | 250  |
| <b>Median</b>             |         |    | 305    | 194 | 79   | 238    | 251 | 4    | 393    | 203 | 183  | 880    | 678  | 409  |
| <b>Mean</b>               |         |    | 360    | 242 | 118  | 363    | 276 | 88   | 436    | 214 | 222  | 1160   | 732  | 427  |
| <b>SD</b>                 |         |    | 236    | 124 | 168  | 276    | 110 | 242  | 219    | 99  | 179  | 605    | 288  | 397  |

## Number of errors

| #  | user   | T-order       | CE   | #Errors |      |          |      |        |      |       |     |
|----|--------|---------------|------|---------|------|----------|------|--------|------|-------|-----|
|    |        |               |      | Slight  |      | Moderate |      | Severe |      | Total |     |
|    |        |               |      | DM      | GGI  | DM       | GGI  | DM     | GGI  | DM    | GGI |
| 1  | DM-GGI | 0             | 2    | 0       | 2    | 1        | 1    | 0      | 5    | 1     |     |
| 2  | GGI-DM | 0             | 0    | 0       | 1    | 1        | 2    | 0      | 3    | 1     |     |
| 3  | DM-GGI | 0             | 2    | 0       | 2    | 0        | 3    | 0      | 7    | 0     |     |
| 4  | GGI-DM | 0             | 0    | 0       | 1    | 0        | 0    | 0      | 1    | 0     |     |
| 5  | DM-GGI | 1             | 0    | 0       | 3    | 0        | 3    | 0      | 6    | 0     |     |
| 6  | GGI-DM | 1             | 0    | 0       | 2    | 0        | 1    | 0      | 3    | 0     |     |
| 7  | DM-GGI | 1             | 0    | 0       | 2    | 0        | 0    | 0      | 2    | 0     |     |
| 8  | DM-GGI | 2             | 1    | 0       | 1    | 0        | 1    | 0      | 3    | 0     |     |
| 9  | GGI-DM | 2             | 0    | 0       | 0    | 0        | 0    | 0      | 0    | 0     |     |
| 10 | DM-GGI | 2             | 0    | 0       | 2    | 0        | 0    | 0      | 2    | 0     |     |
| 11 | GGI-DM | 2             | 0    | 0       | 1    | 0        | 0    | 0      | 1    | 0     |     |
| 12 | DM-GGI | 2             | 0    | 0       | 3    | 0        | 1    | 0      | 4    | 0     |     |
| 13 | GGI-DM | 2             | 1    | 0       | 2    | 0        | 0    | 0      | 3    | 0     |     |
| 14 | DM-GGI | 3             | 1    | 0       | 0    | 0        | 0    | 0      | 1    | 0     |     |
| 15 | GGI-DM | 3             | 0    | 1       | 3    | 0        | 0    | 0      | 3    | 1     |     |
| 16 | DM-GGI | 3             | 1    | 0       | 2    | 1        | 0    | 0      | 3    | 1     |     |
| 17 | GGI-DM | 3             | 1    | 0       | 1    | 0        | 0    | 0      | 2    | 0     |     |
| 18 | DM-GGI | 3             | 0    | 0       | 1    | 0        | 0    | 1      | 1    | 1     |     |
| 19 | GGI-DM | 3             | 1    | 0       | 2    | 0        | 0    | 0      | 3    | 0     |     |
| 20 | DM-GGI | 3             | 1    | 0       | 0    | 0        | 0    | 0      | 1    | 0     |     |
|    |        | <b>Median</b> | 0    | 0       | 2    | 0        | 0    | 0      | 3    | 0     |     |
|    |        | <b>Mean</b>   | 0,55 | 0,05    | 1,55 | 0,15     | 0,60 | 0,05   | 2,70 | 0,25  |     |
|    |        | <b>SD</b>     | 0,69 | 0,22    | 0,94 | 0,37     | 0,99 | 0,22   | 1,78 | 0,44  |     |

## Post-tests questionnaire

| #user         | Q1         |            | Q2         |            | Q3         |            | Q4         |            | Q5          |           | Q6         |            | Q7         |            |
|---------------|------------|------------|------------|------------|------------|------------|------------|------------|-------------|-----------|------------|------------|------------|------------|
|               | [1..7]     |            | [1..7]     |            | [0..3]*    |            | [1..5]     |            | [0,1,2,3]** |           | [1..5]     |            | [1..7]     |            |
|               | MD         | GGI        | MD         | GGI        | MD         | GGI        | MD         | GGI        | MD          | GGI       | MD         | GGI        | MD         | GGI        |
| 1             | 2          | 4          | 2          | 5          | 3          | 0          | 5          | 2          | C+D         | A+B+C+D   | 1          | 5          | 2          | 5          |
| 2             | 3          | 7          | 1          | 7          | 2          | 0          | 3          | 2          | C+D         | A+B+C+D   | 3          | 3          | 2          | 5          |
| 3             | 2          | 6          | 2          | 6          | 2          | 0          | 4          | 1          | C+D         | A+B+C+D   | 3          | 4          | 2          | 6          |
| 4             | 2          | 7          | 3          | 7          | 2          | 0          | 2          | 1          | C+D         | A+B+C+D   | 3          | 5          | 5          | 7          |
| 5             | 3          | 7          | 2          | 5          | 2          | 0          | 4          | 2          | D           | A+B+C+D   | 2          | 4          | 3          | 6          |
| 6             | 4          | 7          | 6          | 6          | 2          | 0          | 2          | 1          | D           | A+B+C+D   | 3          | 5          | 3          | 6          |
| 7             | 4          | 5          | 3          | 7          | 2          | 0          | 2          | 1          | C+D         | A+B+C+D   | 3          | 5          | 5          | 7          |
| 8             | 2          | 7          | 2          | 6          | 2          | 0          | 4          | 1          | C+D         | A+B+C+D   | 2          | 4          | 3          | 6          |
| 9             | 6          | 6          | 2          | 6          | 2          | 0          | 2          | 1          | C+D         | A+B+C+D   | 2          | 5          | 3          | 6          |
| 10            | 3          | 6          | 4          | 6          | 2          | 0          | 1          | 1          | A+B+C+D     | A+B+C+D   | 4          | 4          | 5          | 6          |
| 11            | 5          | 7          | 4          | 6          | 2          | 0          | 5          | 1          | B+C+D       | A+B+C+D   | 5          | 5          | 5          | 6          |
| 12            | 2          | 6          | 4          | 6          | 2          | 0          | 4          | 2          | C+D         | A+B+C+D   | 2          | 5          | 3          | 6          |
| 13            | 5          | 7          | 4          | 7          | 3          | 0          | 4          | 1          | D           | A+B+C+D   | 3          | 5          | 5          | 7          |
| 14            | 1          | 6          | 5          | 6          | 1          | 0          | 3          | 1          | B+C+D       | A+B+C+D   | 4          | 5          | 5          | 6          |
| 15            | 3          | 7          | 3          | 6          | 2          | 0          | 3          | 1          | C+D         | A+B+C+D   | 2          | 4          | 3          | 6          |
| 16            | 3          | 6          | 2          | 6          | 2          | 0          | 4          | 1          | D           | A+B+C+D   | 4          | 5          | 4          | 6          |
| 17            | 2          | 7          | 4          | 6          | 2          | 0          | 2          | 1          | A+B+C+D     | A+B+C+D   | 5          | 5          | 5          | 7          |
| 18            | 3          | 6          | 2          | 7          | 1          | 0          | 5          | 5          | C+D         | A+B+C     | 3          | 5          | 5          | 7          |
| 19            | 5          | 6          | 4          | 6          | 1          | 0          | 4          | 2          | D           | A+B+C+D   | 5          | 5          | 4          | 6          |
| 20            | 5          | 6          | 4          | 6          | 2          | 0          | 2          | 1          | C+D         | A+B+C+D   | 5          | 5          | 6          | 7          |
| <b>Median</b> | <b>3,0</b> | <b>6,0</b> | <b>3,0</b> | <b>6,0</b> | <b>2,0</b> | <b>0,0</b> | <b>3,5</b> | <b>1,0</b> |             |           | <b>3,0</b> | <b>5,0</b> | <b>4,0</b> | <b>6,0</b> |
| <b>Mean</b>   | <b>3,3</b> | <b>6,3</b> | <b>3,2</b> | <b>6,2</b> | <b>2,0</b> | <b>0,0</b> | <b>3,3</b> | <b>1,5</b> | (C+D)       | (A+B+C+D) | <b>3,2</b> | <b>4,7</b> | <b>3,9</b> | <b>6,2</b> |
| <b>SD</b>     | <b>1,4</b> | <b>0,8</b> | <b>1,3</b> | <b>0,6</b> | <b>0,5</b> | <b>0,0</b> | <b>1,2</b> | <b>0,9</b> |             |           | <b>1,2</b> | <b>0,6</b> | <b>1,3</b> | <b>0,6</b> |

**\* Range of values for Q3**

**Grade**

- 0** BOTH of them were EASY
- 1** WHAT to do
- 2** HOW to do  
BOTH of them were
- 3** HARD

**\*\* Items for Q5 (multiple choice)**

**Grade**

- 0** for one time  
for very occasional use (once a year)
- 1** year)
- 2** for once a month
- 3** for daily use

| <b>Q<sub>i</sub></b> | <b>Description</b>                                                                                                                                                                                                           |
|----------------------|------------------------------------------------------------------------------------------------------------------------------------------------------------------------------------------------------------------------------|
| Q <sub>1</sub>       | "Do you consider that the application has helped you in knowing what to do in each step?"                                                                                                                                    |
| Q <sub>2</sub>       | "Do you consider that the application has helped you in knowing how to do it? (what you needed to do)"                                                                                                                       |
| Q <sub>3</sub>       | "What was <i>harder</i> ? [1] knowing <i>what</i> to do, [2] knowing <i>how</i> to get it done, [0] both easy, or [3] both hard" The scores were chosen according to a range between the best and the worst-case scenarios". |
| Q <sub>4</sub>       | "Would you like to have had a more complete <i>help</i> system inside the application interface?"                                                                                                                            |
| Q <sub>5</sub>       | "Choose (multiple choice) types of <i>periodicity</i> of use you consider the application is appropriate for [A] Just once, - [B] Very rarely (once a year), - [C] Once a month, - [D] Daily"                                |
| Q <sub>6</sub>       | "Would you <i>use</i> a similar application for the design of your next kitchen?"                                                                                                                                            |
| Q <sub>7</sub>       | "Do you consider that the application has helped you in knowing what to do in each step?"                                                                                                                                    |

## Comparative questionnaire

| #user      | C1   | C2   | C3   | C4   | C5  | C6  | C7  | C8   |
|------------|------|------|------|------|-----|-----|-----|------|
| 1          | GGI  | GGI  | DM   | GGI  | GGI | GGI | GGI | GGI  |
| 2          | GGI  | GGI  | DM   | GGI  | GGI | GGI | GGI | GGI  |
| 3          | GGI  | GGI  | DM   | GGI  | GGI | GGI | GGI | GGI  |
| 4          | GGI  | GGI  | DM   | GGI  | GGI | GGI | DM  | GGI  |
| 5          | GGI  | GGI  | DM   | GGI  | GGI | GGI | GGI | GGI  |
| 6          | GGI  | GGI  | DM   | GGI  | GGI | DM  | DM  | GGI  |
| 7          | GGI  | GGI  | DM   | GGI  | GGI | GGI | GGI | GGI  |
| 8          | GGI  | GGI  | DM   | GGI  | GGI | GGI | GGI | GGI  |
| 9          | GGI  | GGI  | DM   | GGI  | GGI | GGI | GGI | GGI  |
| 10         | GGI  | GGI  | DM   | GGI  | GGI | GGI | GGI | GGI  |
| 11         | GGI  | GGI  | DM   | GGI  | GGI | GGI | GGI | GGI  |
| 12         | GGI  | GGI  | DM   | GGI  | GGI | DM  | DM  | GGI  |
| 13         | GGI  | GGI  | DM   | GGI  | GGI | GGI | GGI | GGI  |
| 14         | GGI  | GGI  | DM   | GGI  | GGI | GGI | DM  | GGI  |
| 15         | GGI  | GGI  | DM   | GGI  | GGI | GGI | GGI | GGI  |
| 16         | GGI  | GGI  | DM   | GGI  | DM  | GGI | DM  | GGI  |
| 17         | GGI  | GGI  | DM   | GGI  | GGI | GGI | GGI | GGI  |
| 18         | GGI  | GGI  | DM   | GGI  | GGI | GGI | GGI | GGI  |
| 19         | GGI  | GGI  | DM   | GGI  | GGI | GGI | GGI | GGI  |
| 20         | GGI  | GGI  | DM   | GGI  | GGI | GGI | GGI | GGI  |
| <b>GGI</b> | 100% | 100% | 0%   | 100% | 95% | 90% | 75% | 100% |
| <b>DM</b>  | 0%   | 0%   | 100% | 0%   | 5%  | 10% | 25% | 0%   |

| C <sub>i</sub> | Description                                                                                |
|----------------|--------------------------------------------------------------------------------------------|
| C <sub>1</sub> | "With which interface is it easier to know <i>what</i> to do in each moment?"              |
| C <sub>2</sub> | "With which interface is it easier to know <i>what</i> to do in each moment?"              |
| C <sub>3</sub> | "Which interface should include <i>more help</i> systems?"                                 |
| C <sub>4</sub> | "Which interface is <i>easier to use</i> and requires <i>less training</i> ?"              |
| C <sub>5</sub> | "Which interface lets you work <i>quicker</i> ?"                                           |
| C <sub>6</sub> | "Which interface would you recommend for a <i>computer professional occasional use</i> ?"  |
| C <sub>7</sub> | "Which interface would you recommend for a <i>kitchen design professional daily use</i> ?" |
| C <sub>8</sub> | "Which interface would you <i>choose</i> for furnishing your kitchen?"                     |
